# Supplementary material for: Molecular chirality detection using plasmonic and dielectric nanoparticles
Source: Nanophotonics. 2022 Jan 11;11(9):1897–904. doi: 10.1515/nanoph-2021-0649 (PMC11502060; doi:10.1515/nanoph-2021-0649)
Supplement: Supplementary file 1 — Supplementary Material [file j_nanoph-2021-0649_suppl.docx]

**Supplementary Information:**

**Molecular chirality detection using plasmonic and dielectric nanoparticles**

TaeHyung Kim1 and Q-Han Park1,*

1Department of Physics, Korea University, Seoul, 02841, Republic of Korea

*E-mail: [qpark@korea.ac.kr](mailto:qpark@korea.ac.kr)

**S1. Derivation of the chiral Mie theory for achiral core-chiral shell nanosphere**

Here, we provide a detailed derivation of the chiral Mie theory describing an achiral core-chiral shell nanosphere embedded in an achiral background medium. We use the wave-field decomposition method to solve the Maxwell’s equation in an isotropic chiral medium  [1]. The electromagnetic constitutive relation for the chiral medium is given by

where is permittivity, is permeability and is chirality parameter of a chiral medium. Then, the Maxwell’s curl equation in the matrix form is

where the vacuum wavenumber with the angular frequency and the speed of light . Equation (S3) can be diagonalized as

with the wavenumber eigenvalues and .

The linear transformation of electromagnetic fields is

We utilize the set of wave-field instead of the set of total electromagnetic fields .


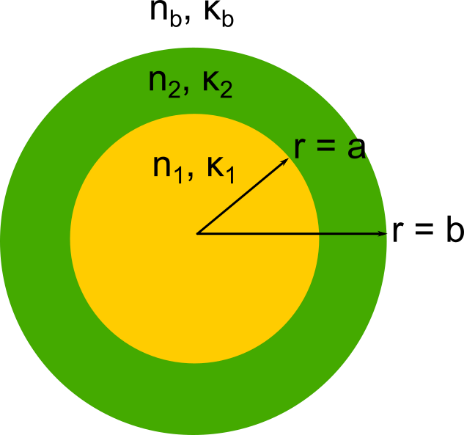
Figure S1. The schematic figure of the chiral Mie theory for a chiral core-chiral shell nanosphere embedded in a chiral medium. The core radius and the radius of entire nanosphere .

We firstly consider the chiral core-chiral shell nanosphere embedded in a chiral background medium as shown in the Figure S1. The core particle radius is , the refractive index is and the chirality parameter is . The entire particle radius is . The refractive index and the chirality parameter of shell is and , respectively. The refractive index and the chirality parameter of background medium is and , respectively. The magnetic permeability of nonmagnetic entire system is .

We can write the incident, scattered and internal fields of Figure S1 system in terms of . The incident fields in the background region are expressed as

The polarization of incident fields is controlled by : denotes the left-circularly polarized light (LCP) and denotes the right-circularly polarized light (RCP). The scattered fields in the background region are expressed as

The internal fields in core region () are

and the internal fields in the shell region () are

The wavenumber in the core region, in the shell region and in the background. The expansion coefficients of scattered fields are , , and . The expansion coefficients of internals fields are , , , , , , , , , , while . , , and are the vector spherical harmonics where subscripts and denote even and odd. The order of vector spherical harmonics is fixed to 1 [1]. The vector spherical harmonics are given by

where superscripts of and are suppressed andstands for the spherical Bessel function. If the superscript is (1), is the spherical Bessel function , for (2) is the spherical Neumann function , for (3)is the spherical Hankel functions of first kind . and with the associated Legendre Polynomials  [1].

The expansion coefficients of scattered and internal fields are determined by boundary conditions. At the surface of the core particle (), the boundary condition is

At the outer surface of a shell (), the boundary condition is

where is the radial unit vector. Using boundary conditions, we obtain 16 equations for the expansion coefficients. These equations can be expressed in the following matrix form;

where contains 16 expansion coefficients in the following order: (, , , , , , , , , , , , , , , ).

The matrix (16 x 16 matrix) is written as

The , , , , , , , and are 4 x 4 matrix.

The matrix (16 x 1 matrix) is written as

where the relative refractive index and . The wavenumber in the core region, the wavenumber in the shell region and the wavenumber in the background.

When the chirality parameters of core region and the background region are turned off (), we can obtain the solution for the achiral core-chiral shell nanosphere embedded in an achiral background medium. Solving equation (S20) in this situation, the expansion coefficients of scattered fields are arranged in the following form

The , , and are scattering coefficients that carry the chirality of the shell region .

The extinction and scattered energy rates are given by [1]

The intensity of incident fields is .

Consequently, we obtain the extinction, scattering and absorption cross section

and the circular differential extinction, scattering and absorption is

**S2. Optical properties of a molecular chiral medium**

The dispersive permittivity and the chirality parameter of chiral medium are expressed by

with the relative permittivity of a solvent , the molecular number density , the electric dipole strength , the molecular rotatory strength , the absorption band frequency and the damping factor . We set the parameter so that the dissymmetry factor of chiral molecular medium has the value of order in the ultraviolet-visible wavelength range [2]. The values of the parameters are , , , and . Figure S3 shows the permittivity, the chirality parameter, and the dissymmetric factor of chiral molecular medium with path length 1 mm.


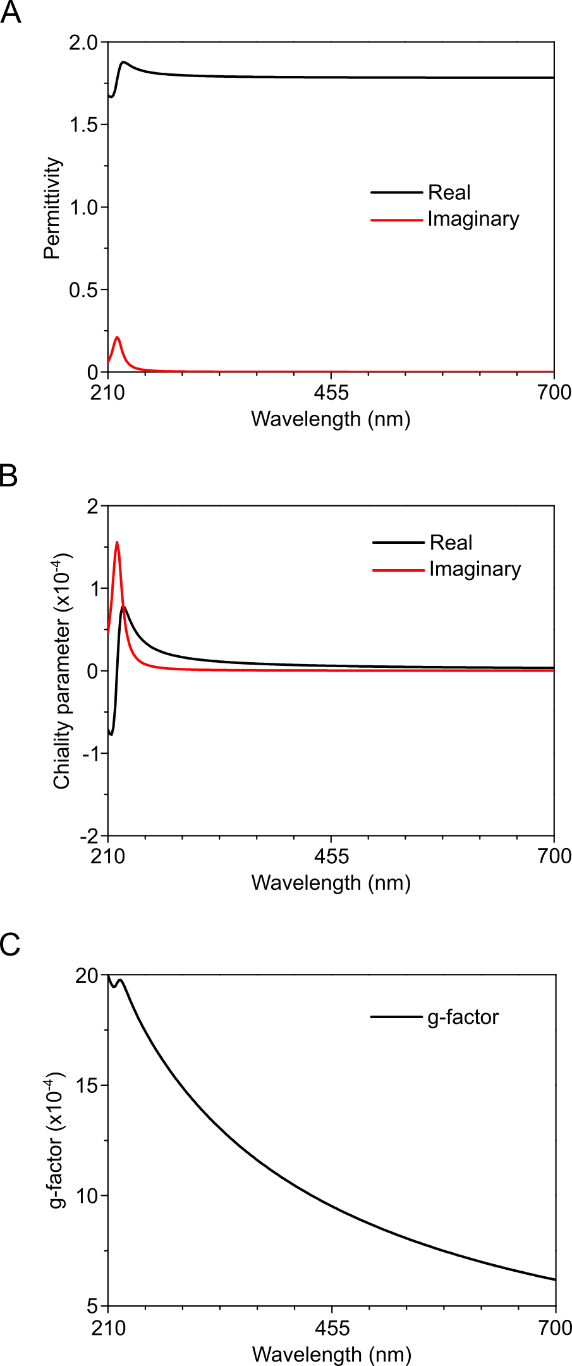


Figure S3. (A) the permittivity (B) the chirality parameter and (C) g-factor of chiral molecular medium. The properties are modeled by the Condon model. The path length of chiral molecular medium is 1 mm.

**S4. Reference**

[1] Bohren CF, Huffman DR. Absorption and Scattering of Light by Small Particles. New Jersey, United States, John Wiley & Sons, Inc., 1998.

[2] Inoue Y, Ramamurthy V. Chiral Photochemistry, New York, United States, Marcel Dekker, 2004.
